# Supplementary material for: Cannabidiol Enhances Cabozantinib-Induced Apoptotic Cell Death via Phosphorylation of p53 Regulated by ER Stress in Hepatocellular Carcinoma
Source: MDPI journal article supplement (doi:10.3390/cancers15153987), 2023-08-05
Supplement: s1 [file s1]

**Supplementary figures for:**

**Cannabidiol enhances cabozantinib-induced apoptotic cell death via phosphorylation of p53 regulated by ER stress in hepatocellular carcinoma**

**Authors:** Youngsic Jeon<sup>1,†</sup>, Taejung Kim<sup>1,2,†</sup>, Hyukjoon Kwon<sup>1</sup>, Jeong Kook Kim<sup>3</sup>, Young-Tae Park<sup>1</sup>, Jungyeob Ham<sup>1,2,3,\*</sup> and Young-Joo Kim<sup>1,\*</sup>

**Author Affiliations:**

<sup>1</sup> Natural Products Research Center, Korea Institute of Science and Technology, Gangneung, Republic of Korea

<sup>2</sup> Division of Bio-Medical Science & Technology, KIST School, University of Science and Technology, Seoul 02792, Republic of Korea,

<sup>3</sup> NeoCannBio Co., Ltd., Seoul, Republic of Korea

## Supplementary Figures

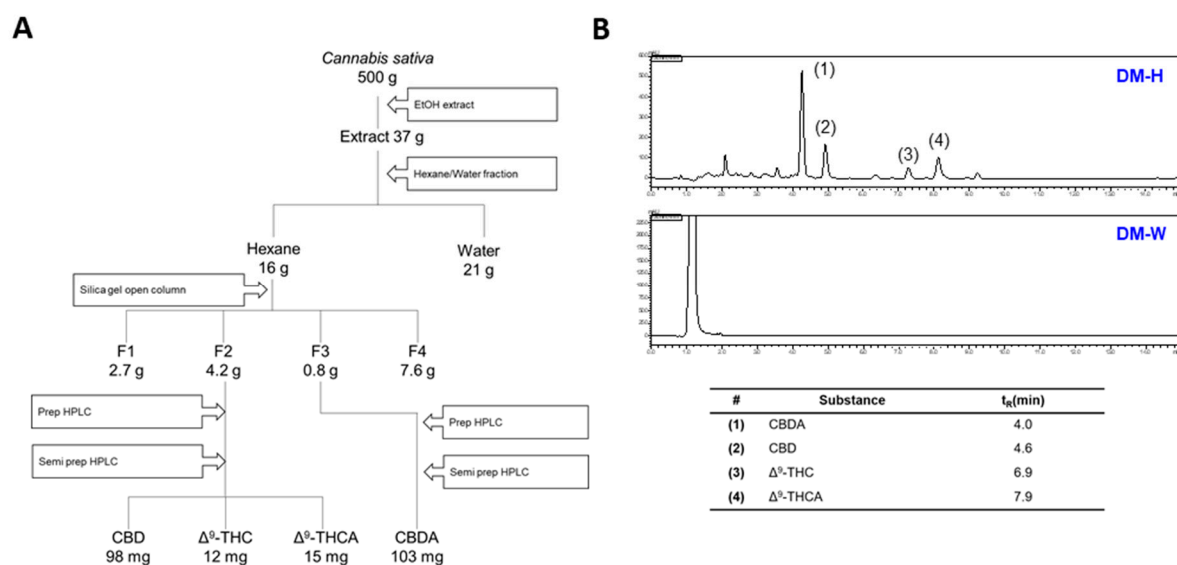

**Figure S1.** Most abundant compounds of cannabis plants. **(A)** The chemical structure of cannabinoids of *Cannabis sativa*. **(B)** High-performance liquid chromatography (HPLC) of ethanolic extracts and separated cannabinoids. **(B)** Extraction and isolation of cannabinoids. CBDA: Cannabidiolic acid, CBD: Cannabidiol,  $\Delta^9$ -THC: Tetrahydrocannabinol,  $\Delta^9$ -THCA: Tetrahydrocannabinolic acid.

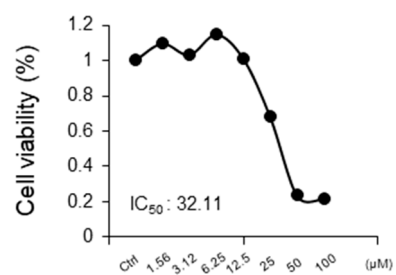

**Figure S2.** Cell viability of cabozantinib and CBD combination treatment in Hep3B. Cytotoxicity mediated by cabozantinib and CBD was assessed using the WST-8 assay in Hep3B.

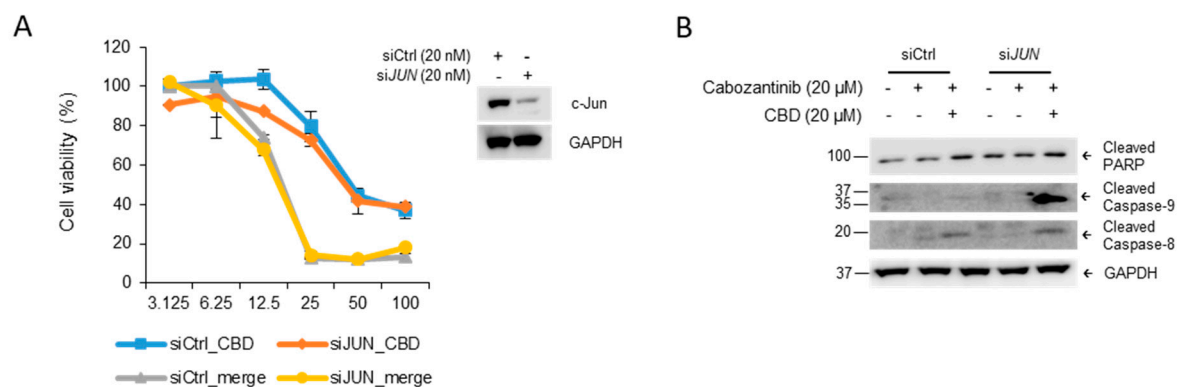

**Figure S3.** The effect of JUN knock-down on apoptosis after the combination treatment. **(A)** *JUN* siRNA (20 nM) and control siRNA (20 nM) were used to transfect HepG2 cells for 48 h; cytotoxicity induced by cabozantinib with and without CBD was assessed using WST-8 assay (*left*) and western blotting (*right*) at different concentrations. **(B)** *JUN* siRNA (20 nM) and control siRNA (20 nM) were used to transfect HepG2 cells, and the levels of apoptosis-related proteins (PARP, cleaved caspase-9, and cleaved caspase-8) were assessed using western blotting. Protein levels were normalized to those of GAPDH.

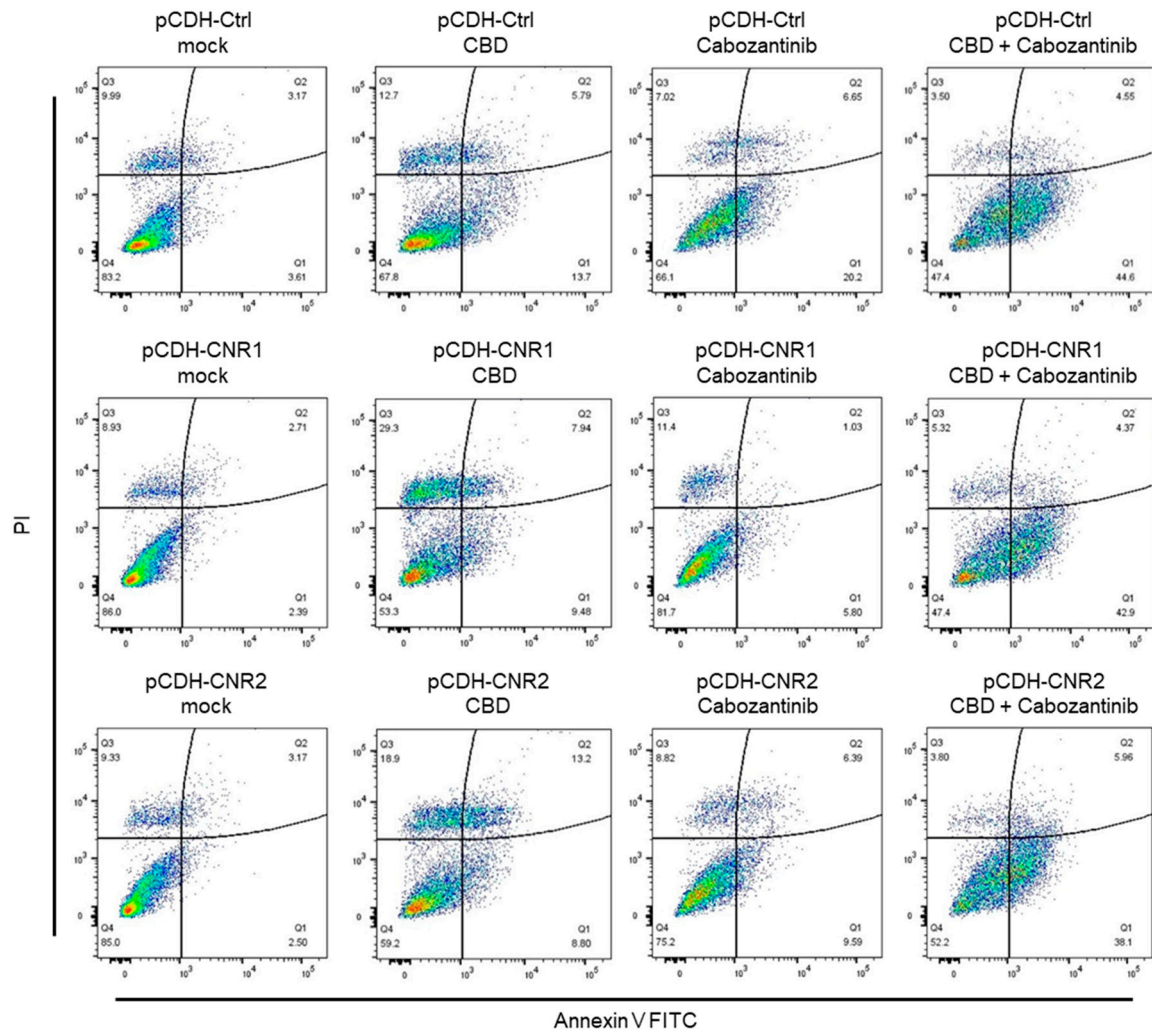

**Figure S4.** The effect of combination treatment in *CNR1* and *CNR2* stable cell lines. Fluorescence-activated cell sorting analysis of early apoptosis in stable cell lines incubated at the indicated condition.
